# Supplementary material for: In Vitro Glucuronidation of Ochratoxin A by Rat Liver Microsomes
Source: Toxins (Basel). 2013 Dec 18;5(12):2671–85. doi: 10.3390/toxins5122671 (PMC3873705; doi:10.3390/toxins5122671)
Supplement: Supplementary File 1 — Supplementary Data (PDF, 525 KB) [file toxins-05-02671-s001.pdf]

## Supplementary Data

**Figure S-1.** Comparison of the contents of three OTA glucuronide conjugates in the Reaction 2 solution untreated (a,b) and the solution hydrolyzed with  $\beta$ -glucuronidase (c,d).

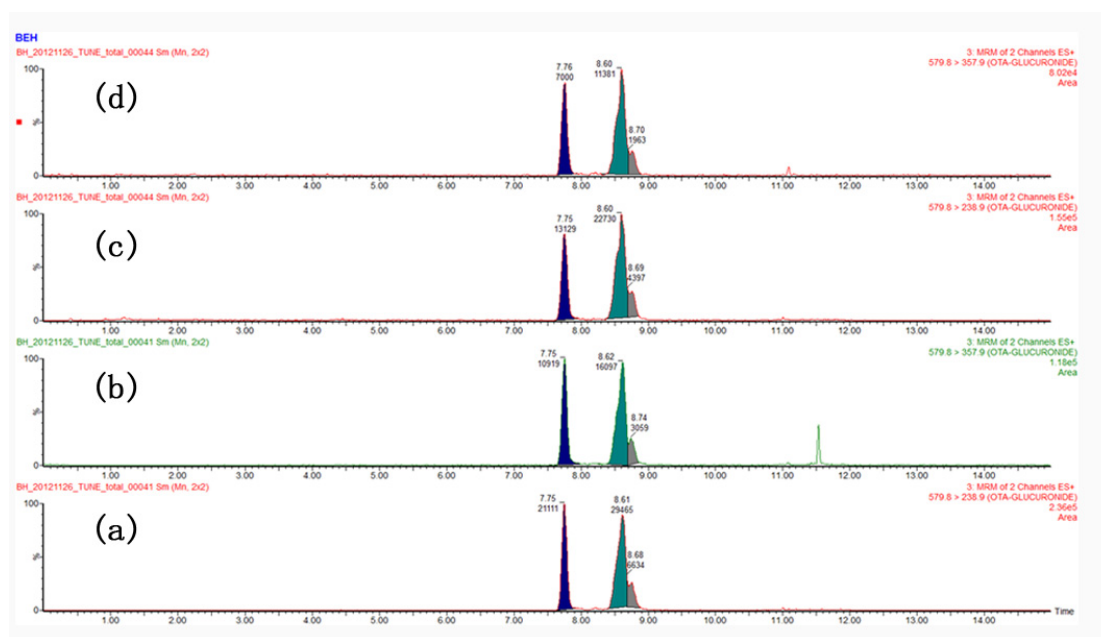

**Figure S-2.** Comparison of the contents of OTA and OTA methyl ester in the solutions before methylation (A,B) and after methylation (a,b).

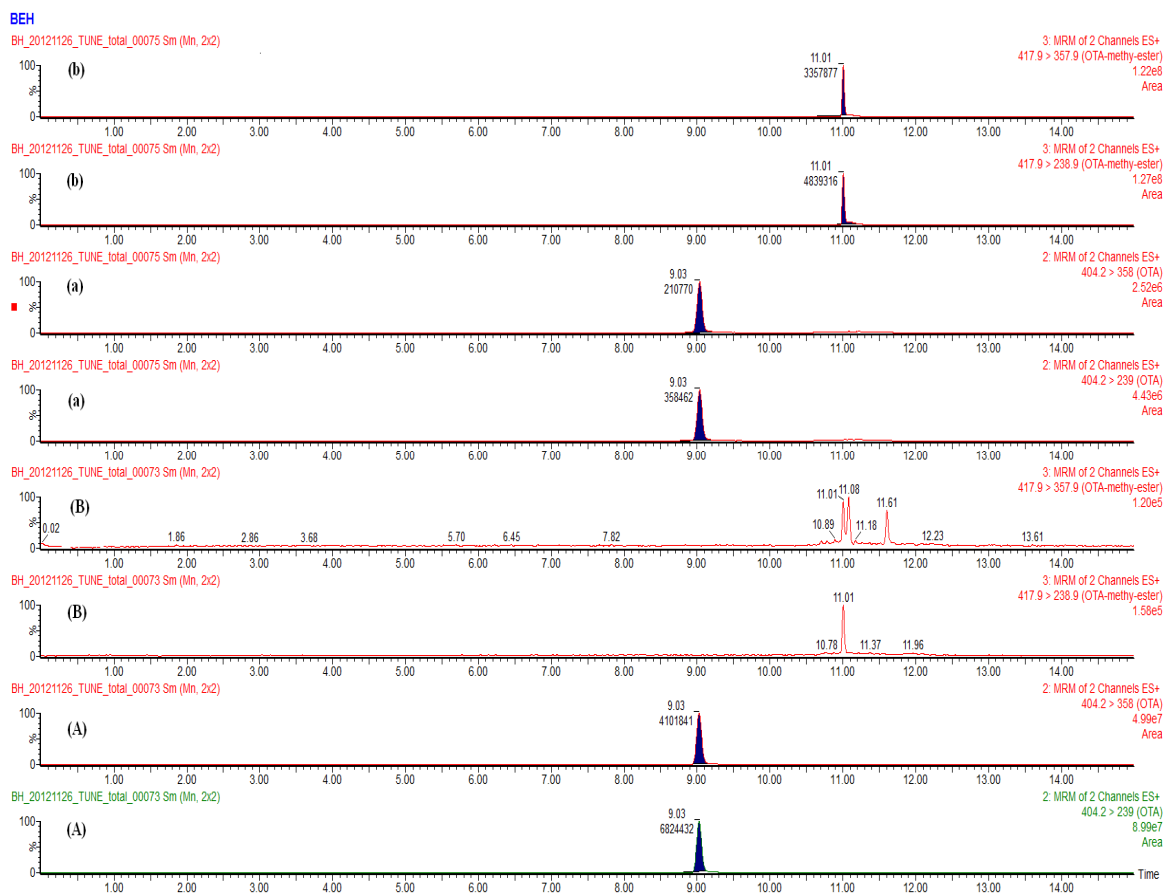

**Figure S-3.** Comparison of the contents of OTA methyl ester in different reaction solutions.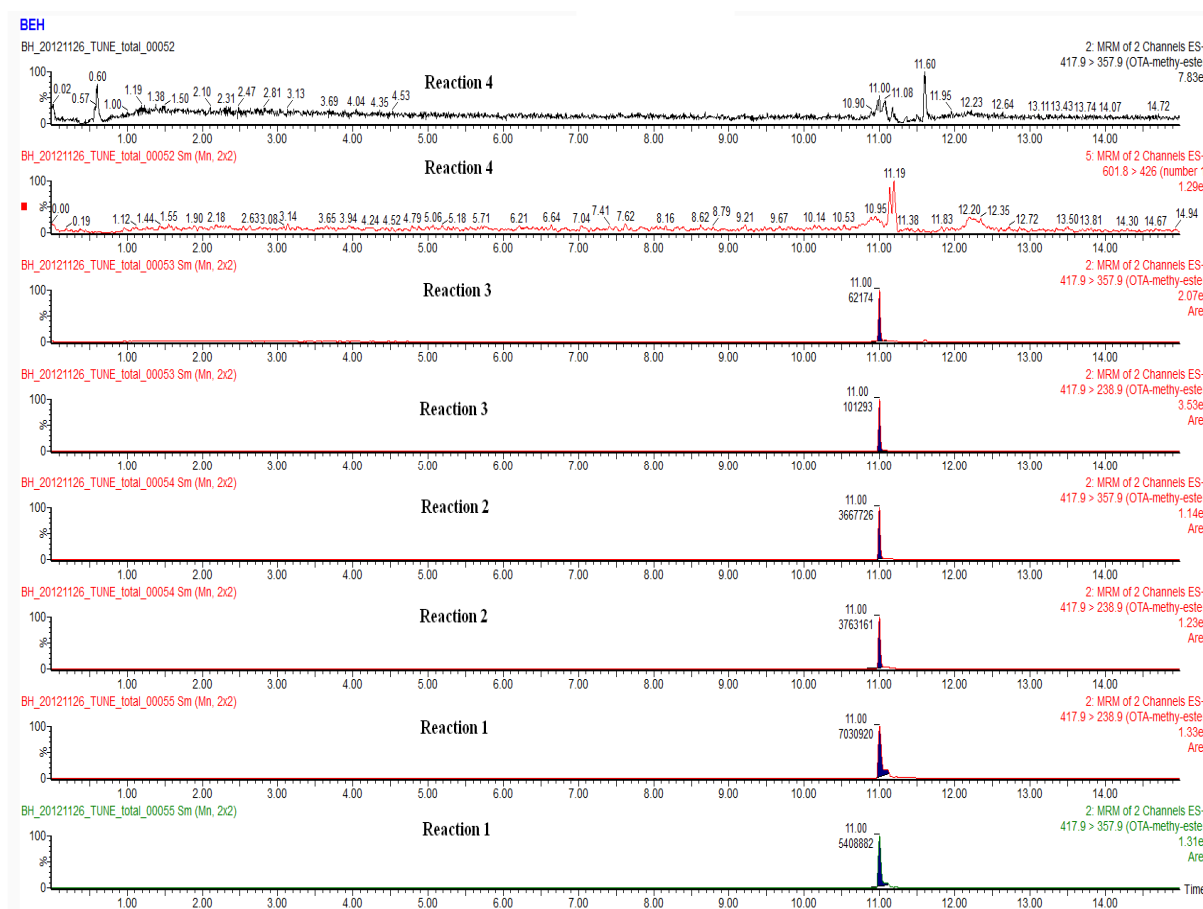**Figure S-4.** Comparison of the contents of OTα in the Reaction 2 solution untreated (a) and in the solution hydrolyzed with  $\beta$ -glucuronidase (b)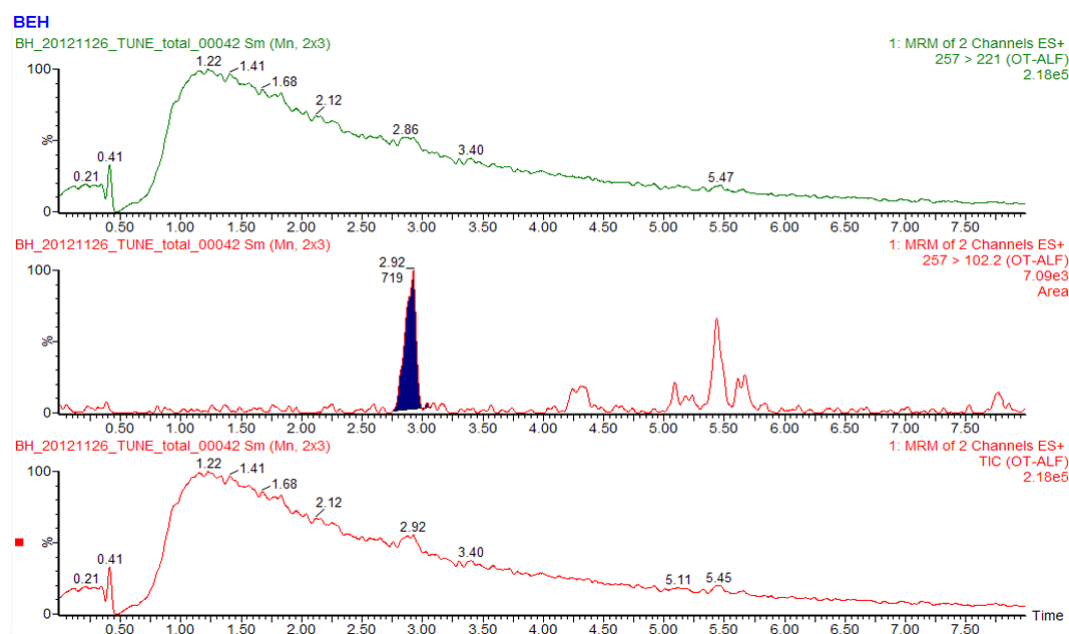

(a)

Figure 4-S. Cont.

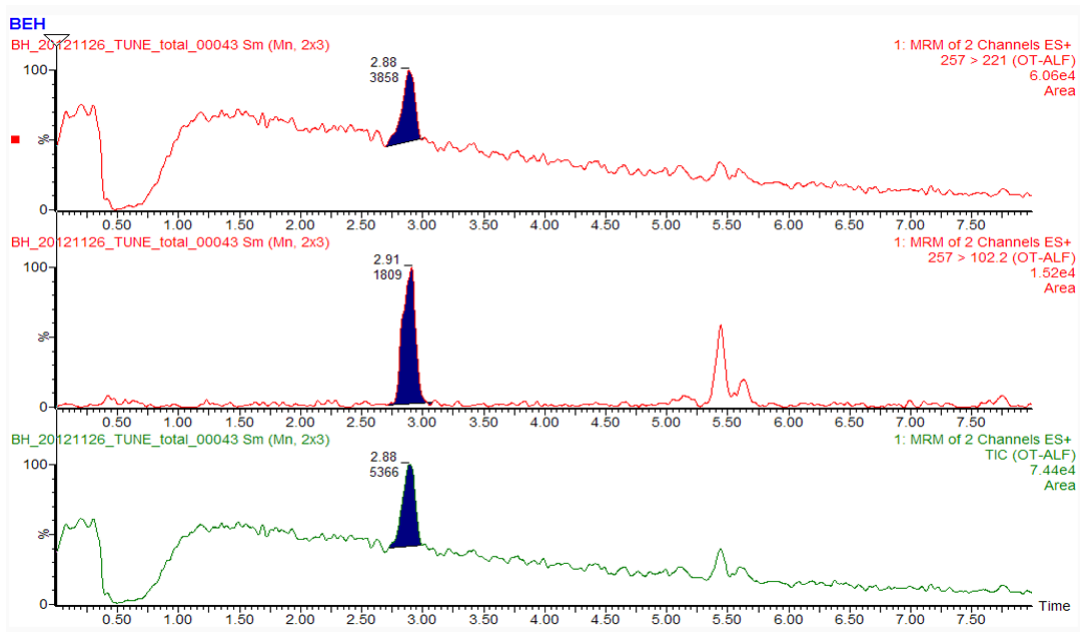

(b)
